# Supplementary material for: Polymorphism of the azobenzene dye compound methyl yellow
Source: Royal Society of Chemistry journal article supplement (doi:10.1039/c6ce00387g), 2016-01-01
Supplement: c6ce00387g1.pdf [file c6ce00387g1.pdf]

## Electronic Supplementary Information

### Polymorphism of the azobenzene dye compound methyl yellow

Dyanne L. Cruickshank,<sup>a,\*</sup> Christopher H. Hendon,<sup>\*,b</sup> Matthew J. R. Verbeek,<sup>a</sup> Aron Walsh<sup>c</sup>  
and Chick C. Wilson<sup>c,d</sup>

<sup>a</sup> Centre for Supramolecular Chemistry Research, Department of Chemistry, University of Cape Town, Rondebosch, 7701, South Africa. E-mail [dyanne.cruickshank@gmail.com](mailto:dyanne.cruickshank@gmail.com)

<sup>b</sup> Department of Chemistry, Massachusetts Institute of Technology, Cambridge, MA, USA. E-mail: [hendon@mit.edu](mailto:hendon@mit.edu)

<sup>c</sup> Department of Chemistry, University of Bath, Bath, BA2 7AY, UK

<sup>d</sup> EPSRC Centre for Innovative Manufacturing in Continuous Manufacturing and Crystallisation (CMAC), University of Bath, Bath, BA2 7AY, UK.

**Table S1:** Solvents used for the recrystallisation of methyl yellow (DAB) and various crystallisation conditions.

| Number | Solvent 1       | Solvent 2         | Crystallisation conditions | Product            |
|--------|-----------------|-------------------|----------------------------|--------------------|
| 1      | Ethanol         | -                 | [a], [b]                   | Form I             |
| 2      | Ethanol         | Water             | [a], [b], [c]              | Form I             |
| 3      | Methanol        | -                 | [a], [b]                   | Form I             |
| 4      | Methanol        | Chloroform        | [a], [b], [c]              | Form I             |
| 5      | THF             | -                 | [a], [b]                   | Form I and Form II |
| 6      | THF             | Water             | [a], [d]                   | Form I             |
| 7      | THF             | Trichloroethylene | [a], [b], [c]              | Form I             |
| 8      | Toluene         | -                 | [a], [b]                   | Form I             |
| 9      | Acetone         | -                 | [a], [b]                   | Form I             |
| 10     | Acetone         | Water             | [a], [b], [c]              | Form I             |
| 11     | Acetonitrile    | -                 | [a], [b]                   | Form I             |
| 12     | Acetonitrile    | Dichloromethane   | [a], [b], [c], [e]         | Form I             |
| 13     | Ethyl acetate   | -                 | [a], [b]                   | Form I             |
| 14     | Isopropanol     | -                 | [a], [b]                   | Form I             |
| 15     | Isopropanol     | Water             | [a], [b], [c]              | Form I             |
| 16     | Dichloromethane | -                 | [a], [b]                   | Form I             |
| 17     | Dichloromethane | Hexane            | [a], [b], [c], [e]         | Form I             |
| 18     | o-xylene        | -                 | [a], [b]                   | Form I             |
| 19     | m-xylene        | -                 | [a], [b]                   | Form I             |
| 20     | p-xylene        | -                 | [a], [b]                   | Form I             |

\*The solubility of DAB in several other solvents was limited.

[a] Solutions were left to crystallise at 4 °C, 23 °C and 60 °C

[b] Solutions were prepared in small, medium and large vials.

[c] Different percentages of each solvent were used.

[d] A layering method was used.

[e] A vapour diffusion method was used.

**Hirshfeld surface analysis for the DAB polymorphs.**

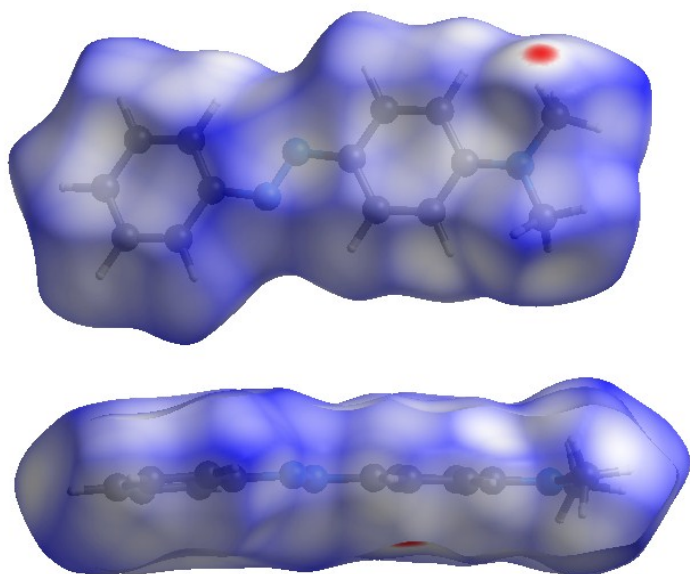

**Figure S1 (a).** DAB Form I, head-on (top) and side view (bottom) illustrating the short intermolecular contact regions in red. The overall, rounded Hirshfeld surface, supports the layered packing arrangement that is seen for this polymorph.<sup>1</sup>

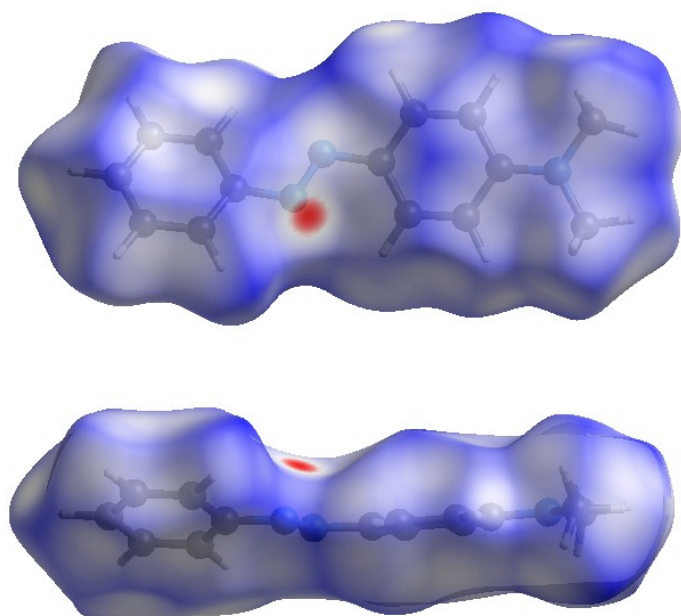

**Figure S1 (b).** DAB Form II, head-on (top) and side view (bottom) illustrating the short intermolecular contact regions in red, which are seen over the azo region. The sharper more curved, Hirshfeld surface around the azo group, supports the herringbone packing arrangement that is seen for this polymorph.<sup>1</sup>

## Powder X-ray Diffraction

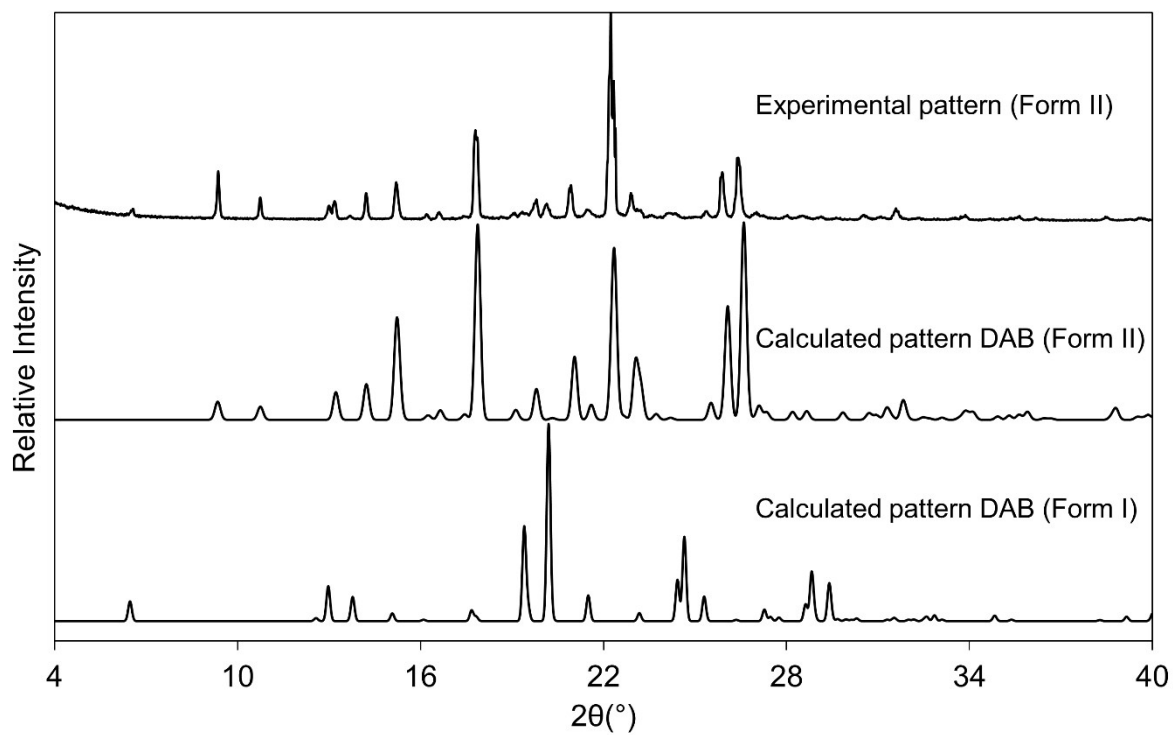

**Figure S2.** PXRD analysis showing the small amount of Form I present in the bulk sample used for DSC analysis.

## Reference

1. M. A. Spackman and D. Jayatilaka, *CrystEngComm*, 2009, **11**, 19-32.
